# Supplementary material
Source: PubMed Central journal article supplement (PMC10913920)
Supplement: JCOPDF-11-037-s001.pdf [file JCOPDF-11-037-s001.pdf]

## **Online Supplement**

### **Inhaler Formulary Change in COPD and the Association with Exacerbations, Health Care Utilization, and Costs**

Kevin I. Duan, MD, MS<sup>1,2</sup> Lucas M. Donovan MD, MS<sup>2,3</sup> Laura J. Spece, MD, MS<sup>2,3</sup> Edwin S. Wong, PhD<sup>2,3,4</sup> Laura C. Feemster, MD, MS<sup>2,3</sup> Alexander D. Bryant, MD, MS<sup>5</sup> Robert Plumley<sup>3</sup> Kristina Crothers, MD<sup>2,3</sup> David H. Au, MD, MS<sup>2,3</sup>

<sup>1</sup> Division of Respiratory Medicine, University of British Columbia, Vancouver, British Columbia, Canada

<sup>2</sup> Division of Pulmonary, Critical Care, and Sleep Medicine, University of Washington, Seattle, Washington, United States

<sup>3</sup> Center of Innovation for Veteran-Centered and Value-Driven Care, Veterans Affairs Puget Sound Health Care System, Seattle, Washington, United States

<sup>4</sup> Department of Health Systems and Population Health, University of Washington, Seattle, Washington, United States

## Defining COPD Exacerbations

- Inpatient COPD exacerbations: Based on established methods used by others (1, 2), we defined inpatient COPD exacerbations as a hospitalization based on diagnosis codes:
  1. Principal diagnosis of COPD (see appendix Table 1 for list of codes), *OR*
  2. Principal diagnosis of respiratory failure with a secondary diagnosis of COPD (see appendix Table 1 for list of codes)
- Outpatient COPD exacerbation: Based on established methods used by others (3–5) we defined outpatient COPD exacerbations as an encounter with a diagnosis of COPD (see appendix Table 1 for list of codes) *AND* a prescription for steroids or antibiotics within +/- 3 days of the encounter. We used a stricter +/- 3 day cutoff as opposed to 5-7 days typically used in other studies to increase specificity of our primary outcome. For antibiotics to be eligible for consideration for a COPD exacerbation, they must not have been prescribed for an encounter associated with urinary tract infection, skin and soft tissue infection, acute sinusitis or pneumonia.

**Supplement Table 1: COPD Diagnosis Codes**

| COPD Diagnosis Codes                |                              |            |                                                                                        |
|-------------------------------------|------------------------------|------------|----------------------------------------------------------------------------------------|
| ICD9 Code                           | Description                  | ICD10 Code | Description                                                                            |
| 491                                 | SIMPLE CHR BRONCHITIS        | J41.0      | Simple chronic bronchitis                                                              |
| 491.1                               | MUCOPURUL CHR BRONCHITIS     | J41.1      | Mucopurulent chronic bronchitis                                                        |
| 491.2                               | OBSTRUCT CHR BRONCHITIS      | J41.8      | Mixed simple and mucopurulent chronic bronchitis                                       |
| 491.2                               | OBST CHR BRONC W/O EXAC      | J42.       | Unspecified chronic bronchitis                                                         |
| 491.21                              | OBS CHR BRONC W(AC) EXAC     | J43.0      | Unilateral pulmonary emphysema [MacLeod's syndrome]                                    |
| 491.22                              | OBS CHR BRONC W AC BRONC     | J43.1      | Panlobular emphysema                                                                   |
| 491.8                               | CHRONIC BRONCHITIS NEC       | J43.2      | Centrilobular emphysema                                                                |
| 491.9                               | CHRONIC BRONCHITIS NOS       | J43.8      | Other emphysema                                                                        |
| 492                                 | EMPHYSEMATOUS BLEB           | J43.9      | Emphysema, unspecified                                                                 |
| 492.8                               | EMPHYSEMA NEC                | J44.0      | Chronic obstructive pulmonary disease with (acute) lower respiratory infection         |
| 496                                 | CHR AIRWAY OBSTRUCT NEC      | J44.1      | Chronic obstructive pulmonary disease with (acute) exacerbation                        |
|                                     |                              | J44.9      | Chronic obstructive pulmonary disease, unspecified                                     |
| Respiratory Failure Diagnosis Codes |                              |            |                                                                                        |
| ICD9 Code                           | Description                  | ICD10 Code | Description                                                                            |
| 518.8                               | LUNG DISEASE NEC             | J96.00     | Acute respiratory failure, unspecified whether with hypoxia or hypercapnia             |
| 518.81                              | ACUTE RESPIRATORY FAILURE    | J96.01     | Acute respiratory failure with hypoxia                                                 |
| 518.82                              | OTHER PULM INSUFF, NEC       | J96.02     | Acute respiratory failure with hypercapnia                                             |
| 518.83                              | CHRONIC RESPIRATORY FAILURE  | J96.10     | Chronic respiratory failure, unspecified whether with hypoxia or hypercapnia           |
| 518.84                              | ACUTE & CHRONIC RESP FAILURE | J96.11     | Chronic respiratory failure with hypoxia                                               |
| 518.89                              | OTHER DISEASE OF LUNG, NEC   | J96.12     | Chronic respiratory failure with hypercapnia                                           |
|                                     |                              | J96.20     | Acute and chronic respiratory failure, unspecified whether with hypoxia or hypercapnia |
|                                     |                              | J96.21     | Acute and chronic respiratory failure with hypoxia                                     |

|  |  |        |                                                                                   |
|--|--|--------|-----------------------------------------------------------------------------------|
|  |  | J96.22 | Acute and chronic respiratory failure with hypercapnia                            |
|  |  | J96.90 | Respiratory failure, unspecified, unspecified whether with hypoxia or hypercapnia |
|  |  | J96.91 | Respiratory failure, unspecified with hypoxia                                     |
|  |  | J96.92 | Respiratory failure, unspecified with hypercapnia                                 |

### Supplement Figure 1: Cohort Selection

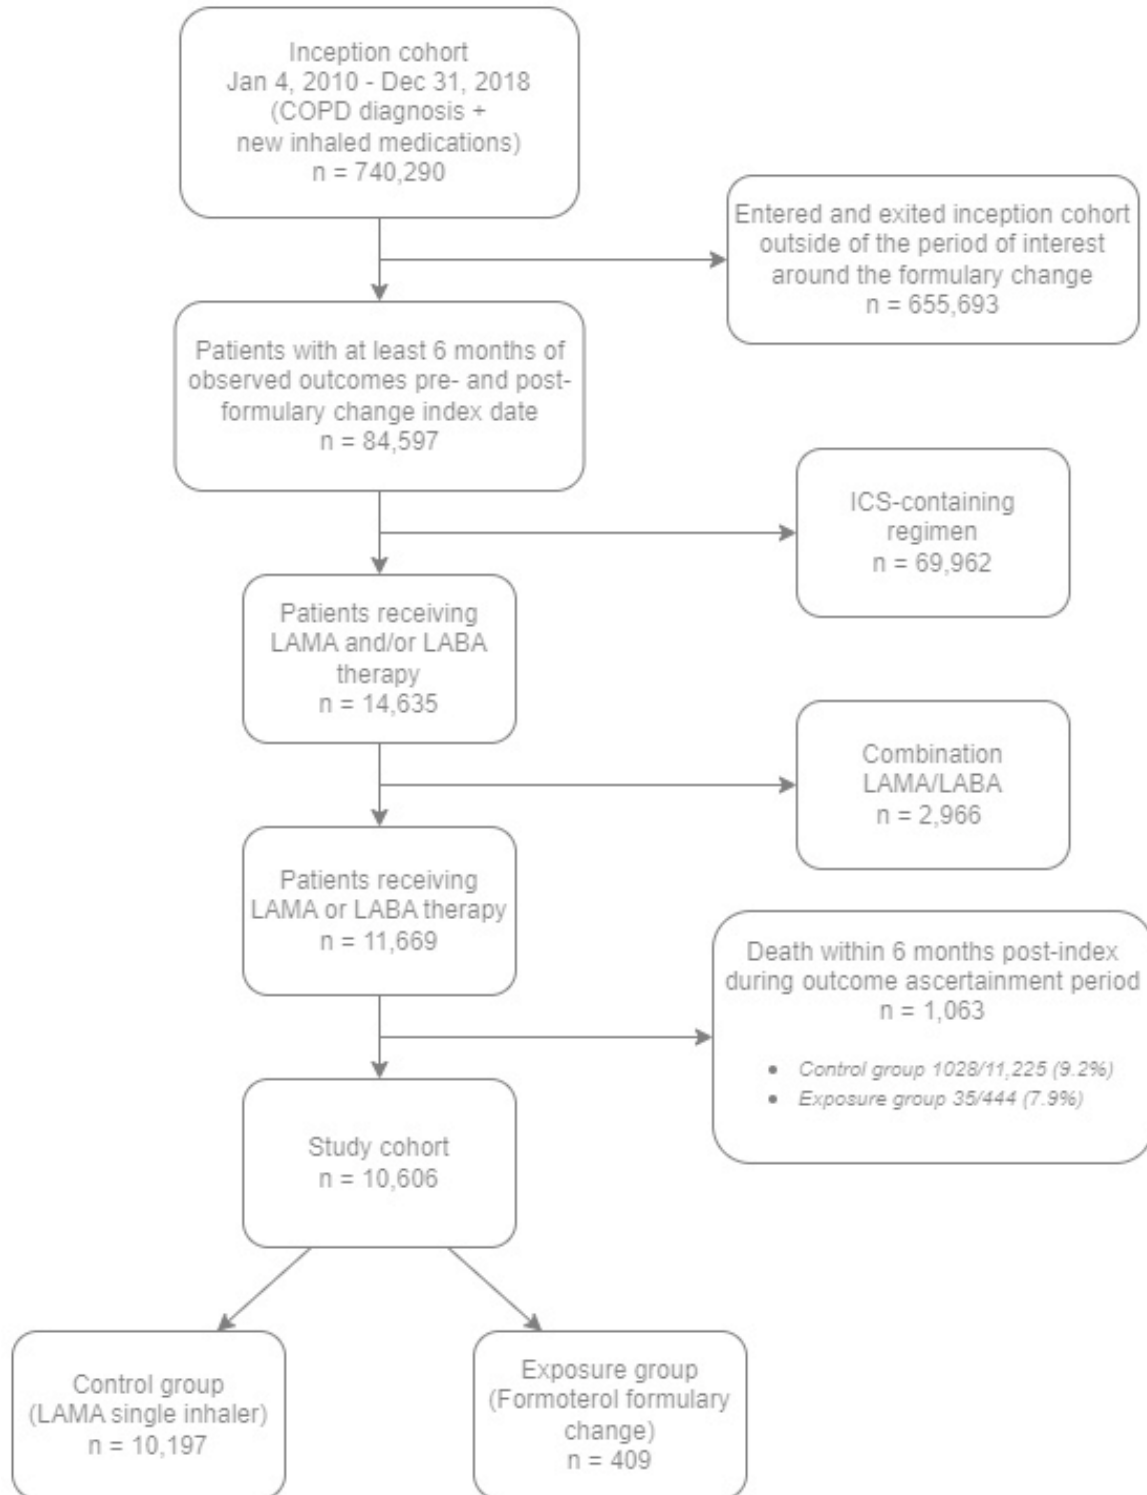

## Supplement Figure 2: Development of Index Date

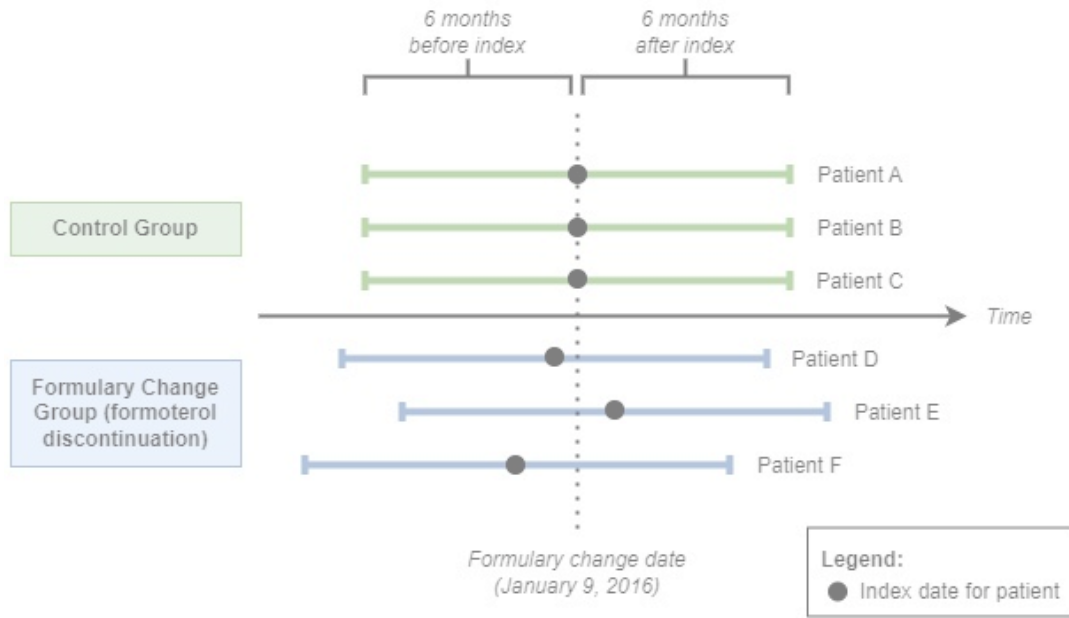

### Parallel Trends Assumption Testing

The parallel trends assumption is important to the validity of the difference-in-differences (DiD) study design. The assumption states that in the absence of the intervention (i.e. the formoterol formulary change in this study), the difference in outcomes between the exposure and control groups would remain constant over time (6). To test the assumption, for each outcome (COPD exacerbations, total encounters and total encounter-related costs), we modeled the relationship between the outcome (monthly) and a time-exposure interaction term using a linear regression model in the 6-month pre-formulary change period. The time-exposure interaction term was constructed by multiplying the time variable (in months) by a dummy variable for our exposure group (patients experiencing a formulary change). We report coefficients, 95% confidence intervals and p-values in Supplement Table 2. A non-statistically significant coefficient for the interaction term suggests that the trend in outcome for the exposure group remain parallel to that of the control group. We did not identify any statistically significant relationships, which suggests that the parallel trends assumption holds.

### Supplement Table 2: Parallel Trends Assumption Test Results

| Outcome                    | Coefficient for time-exposure interaction (95%CI) | p-value |
|----------------------------|---------------------------------------------------|---------|
| COPD Exacerbations (count) | -0.0002 (-0.005, 0.005)                           | 0.92    |
| Total Encounters (count)   | 0.008 (-0.02, 0.04)                               | 0.61    |
| Total Costs (2016 US\$)    | -12.89 (-140.16, 114.37)                          | 0.84    |

**Supplement Table 3: Sensitivity Analysis Evaluating Outcomes in Veterans after Formulary Change Relative to Veterans Without Formulary Change Using an Alternative Exposure Group Definition (excluding patients discontinuing inhalers after the formulary change)**

| Outcome                    | Difference-in-differences estimates* |         |                                     |         |
|----------------------------|--------------------------------------|---------|-------------------------------------|---------|
|                            | Unadjusted, per person per 6 months  |         | Adjusted, per person per 6 months** |         |
|                            | Estimate (95% CI)                    | p-value | Estimate (95% CI)                   | p-value |
| COPD Exacerbations (count) | -0.02 (-0.11, 0.07)                  | 0.65    | -0.04 (-0.11, 0.03)                 | 0.27    |
| Total Encounters (count)   | 0.06 (-0.91, 1.02)                   | 0.90    | 0.11 (-1.00, 1.21)                  | 0.85    |
| Total Costs (2016 US\$)    | 669 (-900, 2238)                     | 0.40    | 904 (-566, 2374)                    | 0.23    |

\* Difference-in-differences estimates are reported as average marginal effects, which can be interpreted as the difference in the 6-month number of encounters or 6-month costs in dollars pre- and post-formulary change for the exposure group, compared to that same pre/post difference in the control group

\*\* Adjusted for age, gender, race, ethnicity, body mass index, Charlson comorbidity index, smoking status, marital status, drive distance, and VA priority group.

**Supplement Table 4: Sensitivity Analysis Evaluating Outcomes in Veterans after Formulary Change Relative to Veterans Without Formulary Change Excluding Patients with Comorbid Asthma**

| Outcome                    | Difference-in-differences estimates* |         |                                     |         |
|----------------------------|--------------------------------------|---------|-------------------------------------|---------|
|                            | Unadjusted, per person per 6 months  |         | Adjusted, per person per 6 months** |         |
|                            | Estimate (95% CI)                    | p-value | Estimate (95% CI)                   | p-value |
| COPD Exacerbations (count) | -0.03 (-0.14, 0.08)                  | 0.61    | -0.03 (-0.10, 0.04)                 | 0.43    |
| Total Encounters (count)   | -0.13 (-0.90, 0.64)                  | 0.73    | -0.15 (-0.98, 0.68)                 | 0.72    |
| Total Costs (2016 US\$)    | 797 (-617, 2211)                     | 0.27    | 875 (-298, 2048)                    | 0.14    |

\* Difference-in-differences estimates are reported as average marginal effects, which can be interpreted as the difference in the 6-month number of encounters or 6-month costs in dollars pre- and post-formulary change for the exposure group, compared to that same pre/post difference in the control group

\*\* Adjusted for age, gender, race, ethnicity, body mass index, Charlson comorbidity index, smoking status, marital status, drive distance, and VA priority group.



**Supplement Table 5: Sensitivity Analysis Evaluating Outcomes in Veterans after Formulary Change Relative to Veterans Without Formulary Change Using an Alternative Exposure Group Definition (including patients switched to LABA/ICS after the formulary change)**

| Outcome                    | Difference-in-differences estimates* |         |                                     |         |
|----------------------------|--------------------------------------|---------|-------------------------------------|---------|
|                            | Unadjusted, per person per 6 months  |         | Adjusted, per person per 6 months** |         |
|                            | Estimate (95% CI)                    | p-value | Estimate (95% CI)                   | p-value |
| COPD Exacerbations (count) | -0.001 (-0.10, 0.09)                 | 0.98    | -0.02 (-0.10, 0.07)                 | 0.66    |
| Total Encounters (count)   | 0.08 (-0.61, 0.76)                   | 0.82    | 0.19 (-0.52, 0.90)                  | 0.60    |
| Total Costs (2016 US\$)    | 566 (-878, 2010)                     | 0.44    | 935 (-562, 2432)                    | 0.22    |

\* Difference-in-differences estimates are reported as average marginal effects, which can be interpreted as the difference in the 6-month number of encounters or 6-month costs in dollars pre- and post-formulary change for the exposure group, compared to that same pre/post difference in the control group

\*\* Adjusted for age, gender, race, ethnicity, body mass index, Charlson comorbidity index, smoking status, marital status, drive distance, and VA priority group.

**Supplement Table 6: Sensitivity Analysis Evaluating Outcomes in Veterans after Formulary Change Relative to Veterans Without Formulary Change Including ICS and Combination Inhalers**

| Outcome                    | Difference-in-differences estimates* |         |                                     |         |
|----------------------------|--------------------------------------|---------|-------------------------------------|---------|
|                            | Unadjusted, per person per 6 months  |         | Adjusted, per person per 6 months** |         |
|                            | Estimate (95% CI)                    | p-value | Estimate (95% CI)                   | p-value |
| COPD Exacerbations (count) | -0.04 (-0.10, 0.03)                  | 0.29    | -0.05 (-0.11, 0.02)                 | 0.20    |
| Total Encounters (count)   | -0.20 (-0.69, 0.28)                  | 0.40    | -0.11 (-0.59, 0.38)                 | 0.66    |
| Total Costs (2016 US\$)    | -196 (-1147, 756)                    | 0.69    | -260 (-1149, 628)                   | 0.57    |

\* Difference-in-differences estimates are reported as average marginal effects, which can be interpreted as the difference in the 6-month number of encounters or 6-month costs in dollars pre- and post-formulary change for the exposure group, compared to that same pre/post difference in the control group

\*\* Adjusted for age, gender, race, ethnicity, body mass index, Charlson comorbidity index, smoking status, marital status, drive distance, and VA priority group.

## References

1. Stein BD, Bautista A, Schumock GT, Lee TA, Charbeneau JT, Lauderdale DS, *et al.* The validity of International Classification of Diseases, Ninth Revision, Clinical Modification diagnosis codes for identifying patients hospitalized for COPD exacerbations. *Chest* 2012;141:87–93.
2. Lindenauer PK, Stefan MS, Pekow PS, Mazor KM, Priya A, Spitzer KA, *et al.* Association Between Initiation of Pulmonary Rehabilitation After Hospitalization for COPD and 1-Year Survival Among Medicare Beneficiaries. *JAMA* 2020;323:1813–1823.
3. Stanford RH, Engel-Nitz NM, Bancroft T, Essoi B. The Identification and Cost of Acute Chronic Obstructive Pulmonary Disease Exacerbations in a United States Population Healthcare Claims Database. *COPD: Journal of Chronic Obstructive Pulmonary Disease* 2020;17:499–508.
4. Sethi S, Make BJ, Robinson SB, Kumar S, Pollack M, Moretz C, *et al.* Relationship of COPD Exacerbation Severity and Frequency on Risks for Future Events and Economic Burden in the Medicare Fee-For-Service Population. *COPD* 2022;Volume 17:593–608.
5. Annavarapu S, Goldfarb S, Gelb M, Moretz C, Renda A, Kaila S. Development and validation of a predictive model to identify patients at risk of severe COPD exacerbations using administrative claims data. *Int J Chron Obstruct Pulmon Dis* 2018;13:2121–2130.
6. Wing C, Simon K, Bello-Gomez RA. Designing Difference in Difference Studies: Best Practices for Public Health Policy Research. *Annu Rev Public Health* 2018;39:453–469.
